# Supplementary material for: Influence of Ge substitution on the structure and optical properties of Cu2ZnSn1−xGexS4 photovoltaic materials
Source: Royal Society of Chemistry journal article supplement (doi:10.1039/d4ta01477d), 2024-01-01
Supplement: d4ta01477d1.pdf [file d4ta01477d1.pdf]

## SUPPORTING INFORMATION

### *Influence of Ge Substitution on the Structure and Optical Properties of Cu<sub>2</sub>ZnSn<sub>1-x</sub>Ge<sub>x</sub>S<sub>4</sub> Photovoltaic Materials*

Amit Bhattacharya<sup>1</sup>, Vidyanshu Mishra<sup>1</sup>, Victor V. Tersikh<sup>2</sup>, Arthur Mar<sup>1\*</sup> and Vladimir K. Michaelis<sup>1\*</sup>

1. Department of Chemistry, University of Alberta, Edmonton, Alberta, Canada T6G 2G2

2. Metrology, National Research Council Canada, Ottawa, Ontario, Canada K1A 0R6

#### NMR Parameters

NMR signals are characterized by two types of tensor quantities:

(a) Chemical shift anisotropy (CSA):

- The position is defined by the *isotropic chemical shift*,  $\delta_{\text{iso}} = \frac{1}{3}(\delta_{11} + \delta_{22} + \delta_{33})$ , where  $\delta_{11} \geq \delta_{22} \geq \delta_{33}$ .
- The breadth is defined by the *span*,  $\Omega = \delta_{11} - \delta_{33}$ .
- The shape is defined by the *skew*,  $\kappa = 3(\delta_{22} - \delta_{\text{iso}})/\Omega$ .

(b) Quadrupolar interactions for nuclei with  $I > 1/2$ :

- The strength of the interaction between a nucleus and the surrounding electric field gradient (EFG) is defined by the *nuclear quadrupole coupling constant*,  $C_Q = eQV_{zz}/h$ , where  $e$  is the elementary charge,  $Q$  is the quadrupolar moment of the nucleus,  $V_{zz}$  is the largest principal component of the EFG, and  $h$  is Planck's constant.
- The symmetry of the EFG tensor is defined by the *asymmetry parameter*,  $\eta = (V_{xx} - V_{yy})/V_{zz}$ , where  $|V_{xx}| \leq |V_{yy}| \leq |V_{zz}|$ .

**Table S1. Experimental Conditions for Acquisition of NMR Spectra of  $\text{Cu}_2\text{ZnSn}_{1-x}\text{Ge}_x\text{S}_4$** 

|                                 | $^{65}\text{Cu}$                          | $^{67}\text{Zn}$                   | $^{119}\text{Sn}$                  | $^{73}\text{Ge}$                  |
|---------------------------------|-------------------------------------------|------------------------------------|------------------------------------|-----------------------------------|
| conditions                      | non-spinning                              | non-spinning                       | non-spinning                       | non-spinning                      |
| $B_0$ (T)                       | 7.05, 11.75, 21.1                         | 21.1                               | 11.75                              | 21.1                              |
| pulse sequence                  | wideline<br>quadrupolar echo <sup>a</sup> | wideline<br>quadrupolar echo       | Hahn echo                          | Bloch                             |
| $\pi/2$ pulse ( $\mu\text{s}$ ) | 1                                         | 3                                  | 4                                  | 4                                 |
| $\gamma B_1/2\pi$ (kHz)         | 125                                       | 28                                 | 62.5                               | 12.5                              |
| $\tau$ ( $\mu\text{s}$ )        | 50                                        | 50                                 | 30                                 | —                                 |
| recycle delay (s)               | 2                                         | 5                                  | 50–100                             | 5                                 |
| rotor diameter (mm)             | 4                                         | 4                                  | 4                                  | 7                                 |
| co-added transients             | 1024–8048                                 | 15360                              | 1024–2048                          | 8192                              |
|                                 | $^{63}\text{Cu}$                          | $^{67}\text{Zn}$                   | $^{119}\text{Sn}$                  | $^{73}\text{Ge}$                  |
| conditions                      | MAS ( $\omega_r/2\pi = 62.5$<br>kHz)      | MAS ( $\omega_r/2\pi = 10$<br>kHz) | MAS ( $\omega_r/2\pi = 14$<br>kHz) | MAS ( $\omega_r/2\pi = 5$<br>kHz) |
| $B_0$ (T)                       | 21.1                                      | 21.1                               | 7.05                               | 21.1                              |
| pulse sequence                  | wideline<br>quadrupolar echo              | Bloch                              | Hahn echo                          | Bloch                             |
| $\pi/2$ pulse ( $\mu\text{s}$ ) | 1                                         | 3                                  | 4                                  | 4                                 |
| $\gamma B_1/2\pi$ (kHz)         | 125                                       | 27.8                               | 62.5                               | 12.5                              |
| $\tau$ ( $\mu\text{s}$ )        | 15                                        | —                                  | 67.4                               | —                                 |
| recycle delay (s)               | 2                                         | 2–5                                | 50–150                             | 2–5                               |
| rotor diameter (mm)             | 1.3                                       | 4                                  | 4                                  | 7                                 |
| co-added transients             | 3072–4096                                 | 32768                              | 1024–5120                          | 1024–16384                        |

<sup>a</sup> Wide-line quadrupolar echo implies a ( $\theta - \tau - \theta - \tau$ -acquire) experiment.  $\theta$  refers to  $90^\circ$  solid pulse with the pulse lengths  $p_1 = p_2$ . See Bodart, P.R., Amoureux, J.P., Dumazy, Y. and Lefort, R. **2000**, Molecular Physics, 98 (19), 1545 and Dumazy, Y., Amoureux, J.P. and Fernandez, C., 2010, Molecular Physics, 90(6), 959

<sup>b</sup>Hahn echo implies a ( $\theta - \tau - 2\theta - \tau$ -acquire) experiment.  $\theta$  refers to  $90^\circ$  nutation angle and the pulse length,  $p_2 = 2 \times p_1$ ;  $p_1$  is the  $90^\circ$  pulse.

**Table S2.** Nuclear Larmor frequencies of  $^{63/65}\text{Cu}$ ,  $^{67}\text{Zn}$ ,  $^{73}\text{Ge}$  and  $^{119}\text{Sn}$  nuclei at the external magnetic field used.

| Nucleus             | Larmor frequency (MHz)<br>at 7.05 T | Larmor frequency (MHz)<br>at 11.75 T | Larmor frequency (MHz)<br>at 21.1 T                         |
|---------------------|-------------------------------------|--------------------------------------|-------------------------------------------------------------|
| $^{63/65}\text{Cu}$ | 85.25 ( $^{65}\text{Cu}$ )          | 142.05 ( $^{65}\text{Cu}$ )          | 238.67( $^{63}\text{Cu}$ ) / 255.67<br>( $^{65}\text{Cu}$ ) |
| $^{67}\text{Zn}$    | -                                   | -                                    | 56.32                                                       |
| $^{73}\text{Ge}$    | -                                   | -                                    | 31.39                                                       |
| $^{119}\text{Sn}$   | 111.90                              | 149.21                               | -                                                           |

**Table S3. EDX Analyses (mol %) for  $\text{Cu}_2\text{ZnSn}_{1-x}\text{Ge}_x\text{S}_4$  Samples <sup>a</sup>**

| $x$  | composition                                               | Cu | Zn | Sn | Ge | S  |
|------|-----------------------------------------------------------|----|----|----|----|----|
| 0    | $\text{Cu}_2\text{ZnSnS}_4$                               | 26 | 11 | 13 | 0  | 51 |
|      | <i>(nominal)</i>                                          | 25 | 12 | 13 | 0  | 50 |
| 0.05 | $\text{Cu}_2\text{ZnSn}_{0.95}\text{Ge}_{0.05}\text{S}_4$ | 23 | 11 | 13 | 1  | 52 |
|      | <i>(nominal)</i>                                          | 25 | 12 | 12 | 1  | 50 |
| 0.20 | $\text{Cu}_2\text{ZnSn}_{0.80}\text{Ge}_{0.20}\text{S}_4$ | 24 | 10 | 11 | 2  | 53 |
|      | <i>(nominal)</i>                                          | 25 | 12 | 10 | 3  | 50 |
| 0.40 | $\text{Cu}_2\text{ZnSn}_{0.60}\text{Ge}_{0.40}\text{S}_4$ | 24 | 12 | 8  | 5  | 51 |
|      | <i>(nominal)</i>                                          | 25 | 12 | 8  | 5  | 50 |
| 0.60 | $\text{Cu}_2\text{ZnSn}_{0.40}\text{Ge}_{0.60}\text{S}_4$ | 25 | 13 | 5  | 7  | 50 |
|      | <i>(nominal)</i>                                          | 25 | 12 | 5  | 8  | 50 |
| 0.80 | $\text{Cu}_2\text{ZnSn}_{0.20}\text{Ge}_{0.80}\text{S}_4$ | 24 | 12 | 3  | 10 | 51 |
|      | <i>(nominal)</i>                                          | 25 | 12 | 3  | 10 | 50 |
| 1.00 | $\text{Cu}_2\text{ZnGeS}_4$                               | 25 | 12 | 0  | 12 | 51 |
|      | <i>(nominal)</i>                                          | 25 | 12 | 0  | 13 | 50 |

<sup>a</sup> Experimental compositions are shown on first line and expected compositions on second line. Estimated uncertainties are 2% for each element.

**Table S4. Cell Parameters for  $\text{Cu}_2\text{ZnSn}_{1-x}\text{Ge}_x\text{S}_4$ . <sup>a</sup>**

| $x$  | compound                                                  | $a$ (Å)   | $c$ (Å)    | $V$ (Å <sup>3</sup> ) | $\eta$ ( $c/2a$ ratio) |
|------|-----------------------------------------------------------|-----------|------------|-----------------------|------------------------|
| 0    | $\text{Cu}_2\text{ZnSnS}_4$                               | 5.4356(3) | 10.8354(1) | 320.14(2)             | 0.997                  |
| 0.05 | $\text{Cu}_2\text{ZnSn}_{0.95}\text{Ge}_{0.05}\text{S}_4$ | 5.4294(1) | 10.8239(1) | 319.08(1)             | 0.997                  |
| 0.20 | $\text{Cu}_2\text{ZnSn}_{0.80}\text{Ge}_{0.20}\text{S}_4$ | 5.4167(1) | 10.7758(1) | 316.17(1)             | 0.995                  |
| 0.40 | $\text{Cu}_2\text{ZnSn}_{0.60}\text{Ge}_{0.40}\text{S}_4$ | 5.3987(2) | 10.7128(5) | 312.23(2)             | 0.992                  |
| 0.60 | $\text{Cu}_2\text{ZnSn}_{0.40}\text{Ge}_{0.60}\text{S}_4$ | 5.3754(1) | 10.6414(3) | 307.48(1)             | 0.989                  |
| 0.80 | $\text{Cu}_2\text{ZnSn}_{0.20}\text{Ge}_{0.80}\text{S}_4$ | 5.3641(1) | 10.5855(1) | 304.58(1)             | 0.987                  |
| 1.00 | $\text{Cu}_2\text{ZnGeS}_4$                               | 5.3449(1) | 10.5137(1) | 300.35(1)             | 0.983                  |

<sup>a</sup> Refined from powder XRD patterns. Standard uncertainties are shown in parentheses.

**Table S5. Atomic Coordinates for Cu<sub>2</sub>ZnSnS<sub>4</sub> and Cu<sub>2</sub>ZnGeS<sub>4</sub>.**

| atom                                                      | Wyckoff position | x          | y         | z         |
|-----------------------------------------------------------|------------------|------------|-----------|-----------|
| Cu <sub>2</sub> ZnSnS <sub>4</sub> ( <i>I</i> $\bar{4}$ ) |                  |            |           |           |
| Cu1                                                       | 2 <i>c</i>       | 0          | ½         | ¼         |
| Cu2                                                       | 2 <i>a</i>       | 0          | 0         | 0         |
| Zn                                                        | 2 <i>d</i>       | 0          | ½         | ¾         |
| Sn                                                        | 2 <i>b</i>       | 0          | 0         | ½         |
| S                                                         | 8 <i>g</i>       | 0.2469(4)  | 0.2524(4) | 0.1274(3) |
| Cu <sub>2</sub> ZnGeS <sub>4</sub> ( <i>I</i> $\bar{4}$ ) |                  |            |           |           |
| Cu1                                                       | 2 <i>c</i>       | 0          | ½         | ¼         |
| Cu2                                                       | 2 <i>a</i>       | 0          | 0         | 0         |
| Zn                                                        | 2 <i>d</i>       | 0          | ½         | ¾         |
| Ge                                                        | 2 <i>b</i>       | 0          | 0         | ½         |
| S                                                         | 8 <i>g</i>       | 0.2601(14) | 0.244(4)  | 0.1217(1) |

**Table S6. Calculations of the tetragonal angular variance ( $\sigma^2$ ) for Cu<sub>2</sub>ZnSnS<sub>4</sub> and Cu<sub>2</sub>ZnGeS<sub>4</sub> <sup>a</sup>**

<sup>a</sup>  $\sigma^2 = \frac{1}{5} \sum_{i=1}^6 (\theta_i - 109.47^\circ)^2$ ; where  $\theta_i$  pertains to  $\angle$ S-Cu-S angles.

| Cu <sub>2</sub> ZnSnS <sub>4</sub> |             |             |                                                      |                                                      |                                               |
|------------------------------------|-------------|-------------|------------------------------------------------------|------------------------------------------------------|-----------------------------------------------|
| Wyckoff position                   | Angle A (°) | Angle B (°) | C [( $\theta_i - 109.47^\circ$ ) <sup>2</sup> for A] | D [( $\theta_i - 109.47^\circ$ ) <sup>2</sup> for B] | $\sigma^2$ [(4×C+2×D)/5] in (° <sup>2</sup> ) |
| 2 <i>c</i> (Cu1)                   | 109.2 (×4)  | 110.1 (×2)  | 0.07                                                 | 0.39                                                 | 0.2                                           |
| 2 <i>a</i> (Cu2)                   | 109.9(×4)   | 108.5 (×2)  | 0.18                                                 | 0.94                                                 | 0.5                                           |
| Cu <sub>2</sub> ZnGeS <sub>4</sub> |             |             |                                                      |                                                      |                                               |
| 2 <i>c</i> (Cu1)                   | 108.1 (×2)  | 112.3 (×4)  | 1.77                                                 | 0.45                                                 | 1.6                                           |
| 2 <i>a</i> (Cu2)                   | 110.8 (×2)  | 108.8 (×4)  | 1.88                                                 | 8.01                                                 | 4.7                                           |

**Table S7. Comparison of Experimental and DFT-Calculated NMR Parameters for Cu<sub>2</sub>ZnSnS<sub>4</sub> and Cu<sub>2</sub>ZnGeS<sub>4</sub>.<sup>a</sup>**

|                                    | Cu <sub>2</sub> ZnSnS <sub>4</sub> |                    | Cu <sub>2</sub> ZnGeS <sub>4</sub> |                         |                         |
|------------------------------------|------------------------------------|--------------------|------------------------------------|-------------------------|-------------------------|
|                                    | experimental                       | calculated         | experimental                       | calculated<br>(model A) | calculated<br>(model C) |
| <b><sup>65</sup>Cu parameters</b>  |                                    |                    |                                    |                         |                         |
| $\Omega$ (ppm)                     | 272 (2a), 117 (2c)                 | 284 (2a), 136 (2c) | 150 (2a), 83 (2c)                  | 176 (2a), 190 (2c)      | 185                     |
| $\kappa$                           | +1 (2a), -1 (2c)                   | +1 (2a), -1 (2c)   | -1 (2a), -1 (2c)                   | +1 (2a), -1 (2c)        | -1                      |
| $C_Q$ (MHz)                        | 6.5 (2a), 1.5 (2c)                 | 7.1 (2a), 3.6 (2c) | 15.2 (2a), 4.3 (2c)                | 15.5 (2a), 4.2 (2c)     | 8.2                     |
| $\eta$                             | 0 (2a), 0 (2c)                     | 0 (2a), 0 (2c)     | 0 (2a), 0 (2c)                     | 0 (2a), 0 (2c)          | 0                       |
| <b><sup>67</sup>Zn parameters</b>  |                                    |                    |                                    |                         |                         |
| $\Omega$ (ppm)                     | 29                                 | 34                 | — <sup>b</sup>                     | 15                      | 17                      |
| $\kappa$                           | -0.5                               | -1                 | — <sup>b</sup>                     | +1                      | -1                      |
| $C_Q$ (MHz)                        | 0.9                                | 1.8                | 2.8                                | 5.1                     | 7.4                     |
| $\eta$                             | 0                                  | 0                  | 0.2                                | 0                       | 0                       |
| <b><sup>119</sup>Sn parameters</b> |                                    |                    |                                    |                         |                         |
| $\Omega$ (ppm)                     | 32                                 | 39                 |                                    |                         |                         |
| $\kappa$                           | -0.4                               | -1                 |                                    |                         |                         |
| <b><sup>73</sup>Ge parameters</b>  |                                    |                    |                                    |                         |                         |
| $\Omega$ (ppm)                     |                                    |                    | 14 <sup>b</sup>                    | 26                      | 39                      |
| $\kappa$                           |                                    |                    | -1 <sup>b</sup>                    | -1                      | +1                      |
| $C_Q$ (MHz)                        |                                    |                    | 0.3                                | 0.3                     | 1.8                     |
| $\eta$                             |                                    |                    | 0.0                                | 0                       | 0                       |

<sup>a</sup> Uncertainties are  $\pm 5$  ppm for  $\Omega$ ,  $\pm 0.05$  for  $\kappa$ ,  $\pm 0.1$  MHz for  $C_Q$ , and  $\pm 0.1$  for  $\eta$ . <sup>b</sup>  $\Omega$  and  $\kappa$  do not noticeably improve the fittings.

**Table S8.  $^{65}\text{Cu}$  NMR Parameters for  $\text{Cu}_2\text{ZnSn}_{0.8}\text{Ge}_{0.2}\text{S}_4$  <sup>a</sup>**

|      | $\delta_{\text{iso}}$ (ppm) | $\Omega$ (ppm) | $\kappa$ | $C_Q$ (MHz) |
|------|-----------------------------|----------------|----------|-------------|
| 2a_1 | 761                         | 255            | +1       | 7.5         |
| 2a_2 | 720                         | 220            | +1       | 11.8        |
| 2a_3 | 690                         | 132            | -1       | 16.5        |
| 2c_1 | 795                         | 101            | -1       | 1.5         |
| 2c_2 | 805                         | 99             | -1       | 2.6         |
| 2c_3 | 780                         | 81             | -1       | 4.4         |

<sup>a</sup> The labels 1, 2, 3 refer to  $C_Q$  values in ascending order for 2a and 2c sites.

**Table S9. Chemical Shifts and Linewidths for  $^{119}\text{Sn}$  and  $^{73}\text{Ge}$  MAS NMR Spectra for  $\text{Cu}_2\text{ZnSn}_{1-x}\text{Ge}_x\text{S}_4$** 

| $x$  | compound                                                  | $^{119}\text{Sn}$           |           | $^{73}\text{Ge}$            |           |
|------|-----------------------------------------------------------|-----------------------------|-----------|-----------------------------|-----------|
|      |                                                           | $\delta_{\text{iso}}$ (ppm) | FWHM (Hz) | $\delta_{\text{cgs}}$ (ppm) | FWHM (Hz) |
| 0    | $\text{Cu}_2\text{ZnSnS}_4$                               | 121.5                       | 795       |                             |           |
| 0.05 | $\text{Cu}_2\text{ZnSn}_{0.95}\text{Ge}_{0.05}\text{S}_4$ | -119.8                      | 919       | 21.2                        | 280       |
| 0.20 | $\text{Cu}_2\text{ZnSn}_{0.80}\text{Ge}_{0.20}\text{S}_4$ | -118.1                      | 1252      | 21.6                        | 195       |
| 0.40 | $\text{Cu}_2\text{ZnSn}_{0.60}\text{Ge}_{0.40}\text{S}_4$ | -112.1                      | 1080      | 23.4                        | 488       |
| 0.60 | $\text{Cu}_2\text{ZnSn}_{0.40}\text{Ge}_{0.60}\text{S}_4$ | -111.4                      | 2254      | 23.1                        | 236       |
| 0.80 | $\text{Cu}_2\text{ZnSn}_{0.20}\text{Ge}_{0.80}\text{S}_4$ | -103.2                      | 1199      | 26.3                        | 151       |
| 1.00 | $\text{Cu}_2\text{ZnGeS}_4$                               |                             |           | 28.5                        | 95        |

**Table S10. Isotropic Chemical Shifts and Centre-of-Gravity Shifts of  $^{67}\text{Zn}$  MAS NMR Spectra for  $\text{Cu}_2\text{ZnSn}_{1-x}\text{Ge}_x\text{S}_4$**

| $x$  | compound                                                  | $\delta_{\text{iso}}$ (ppm) | $\delta_{\text{cgs}}$ (ppm) |
|------|-----------------------------------------------------------|-----------------------------|-----------------------------|
| 0    | $\text{Cu}_2\text{ZnSnS}_4$                               | 361                         | 359                         |
| 0.05 | $\text{Cu}_2\text{ZnSn}_{0.95}\text{Ge}_{0.05}\text{S}_4$ |                             | 361                         |
| 0.20 | $\text{Cu}_2\text{ZnSn}_{0.80}\text{Ge}_{0.20}\text{S}_4$ |                             | 368                         |
| 0.40 | $\text{Cu}_2\text{ZnSn}_{0.60}\text{Ge}_{0.40}\text{S}_4$ |                             | 382                         |
| 0.60 | $\text{Cu}_2\text{ZnSn}_{0.40}\text{Ge}_{0.60}\text{S}_4$ |                             | 378                         |
| 0.80 | $\text{Cu}_2\text{ZnSn}_{0.20}\text{Ge}_{0.80}\text{S}_4$ |                             | 367                         |
| 1.00 | $\text{Cu}_2\text{ZnGeS}_4$                               | 358                         | 343                         |

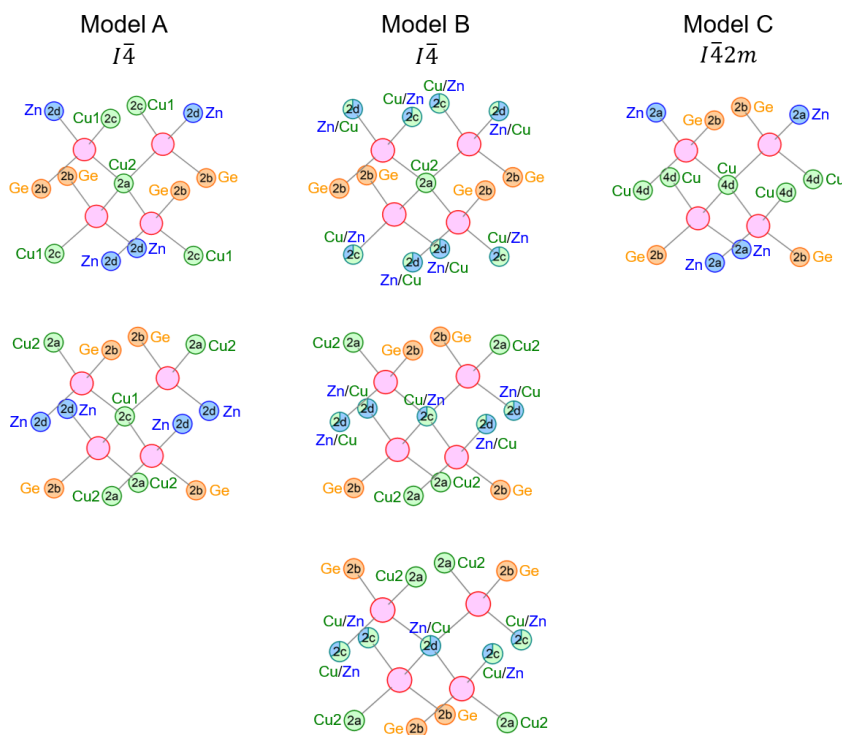

**Figure S1.** Local environments around Cu atoms in three structural models of  $\text{Cu}_2\text{ZnGeS}_4$ .



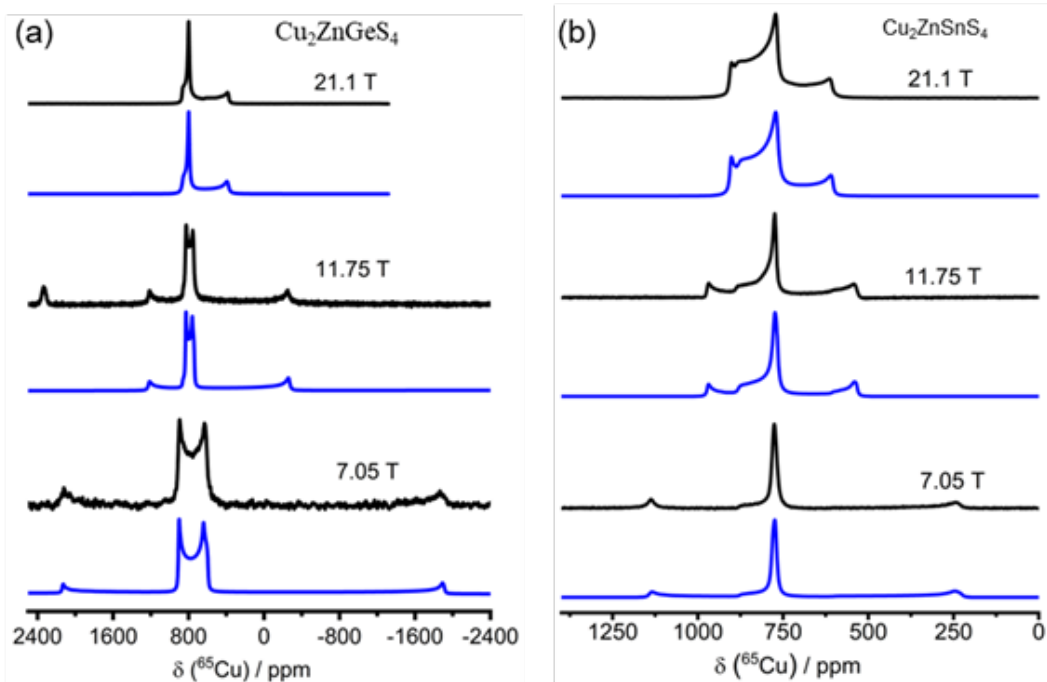

**Figure S2.** Experimental (black) and simulated (blue)  $^{65}\text{Cu}$  NMR spectra of stationary samples at three applied magnetic fields for (a)  $\text{Cu}_2\text{ZnGeS}_4$  and (b)  $\text{Cu}_2\text{ZnSnS}_4$ .

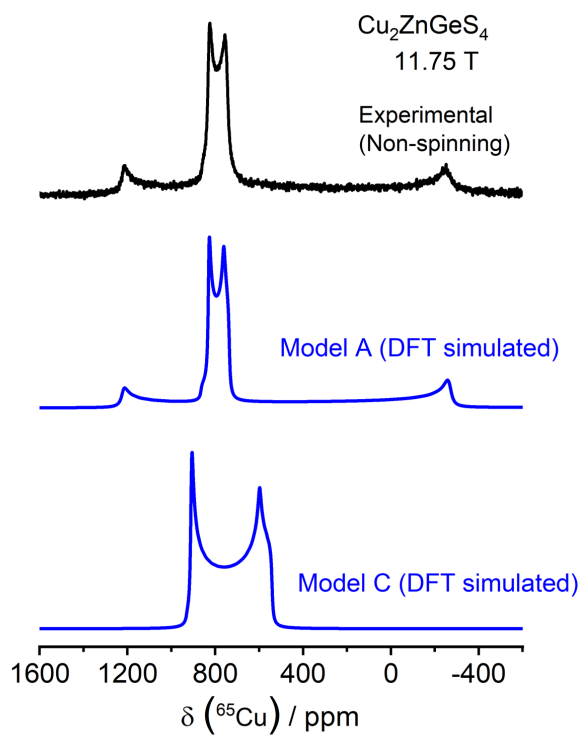

**Figure S3.** Experimental (black) and simulated (blue)  $^{65}\text{Cu}$  NMR spectra of stationary samples for  $\text{Cu}_2\text{ZnGeS}_4$  in models A and C. Parameters for the simulated spectra are listed in Table S5.

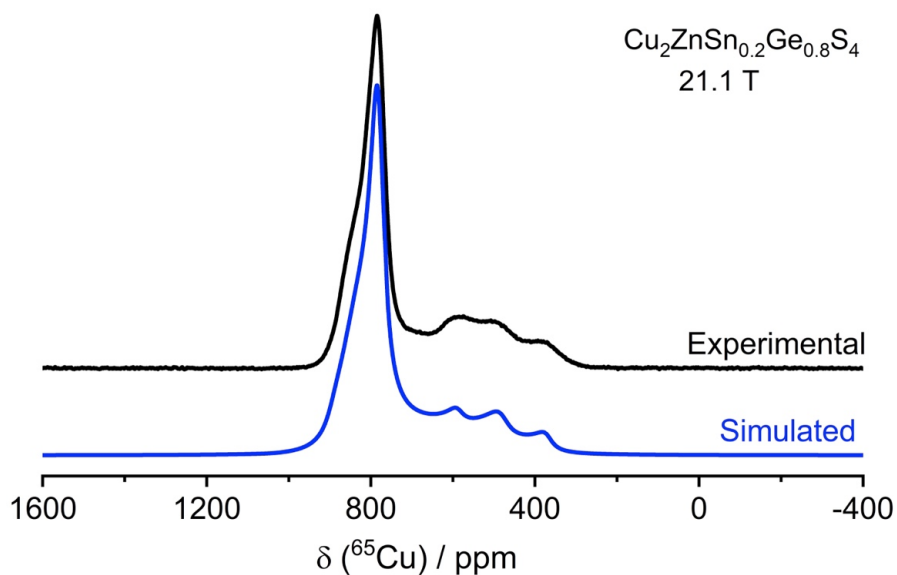

**Figure S4.** Experimental (black) and simulated (dark blue)  $^{65}\text{Cu}$  NMR spectra of stationary samples for  $\text{Cu}_2\text{ZnSn}_{0.2}\text{Ge}_{0.8}\text{S}_4$  in model A. Parameters for the simulated spectra are listed in Table S6.

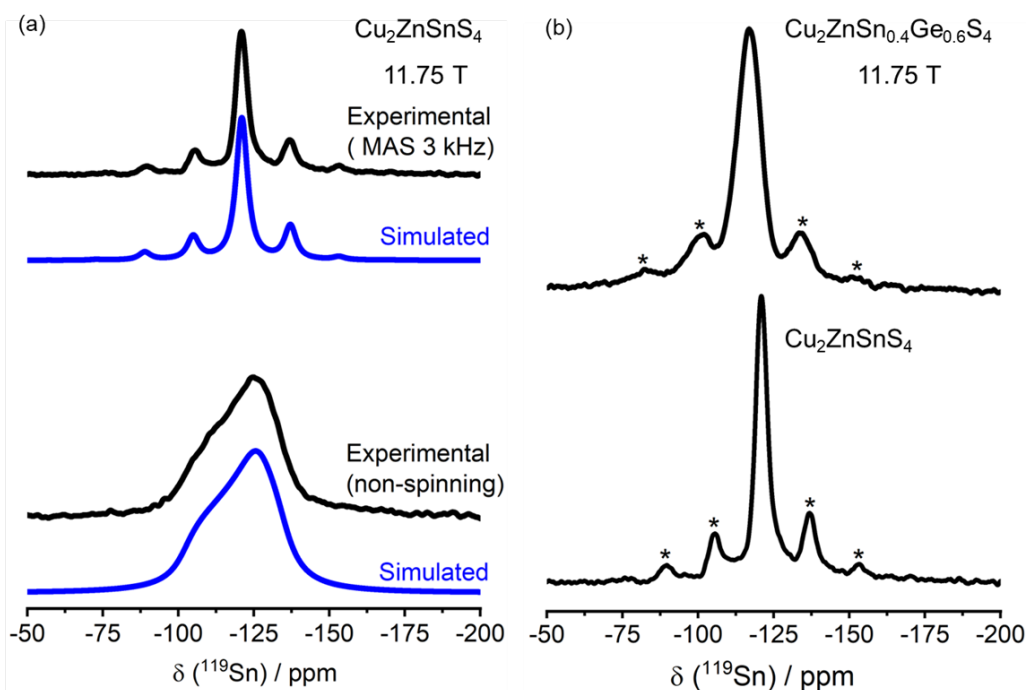

**Figure S5.** (a) Experimental (black) and simulated (blue)  $^{119}\text{Sn}$  slow spinning ( $\omega_r/2\pi = 3$  kHz) and non-spinning NMR spectra for  $\text{Cu}_2\text{ZnSnS}_4$  ( $B_0 = 11.75$  T,  $\delta_{\text{iso}} = -121$  ppm,  $\Omega = 32$  ppm, and  $\kappa = 0.4$ ). (b) Comparison of slow MAS ( $\omega_r/2\pi = 3$  kHz)  $^{119}\text{Sn}$  spectra for  $\text{Cu}_2\text{ZnSnS}_4$  and  $\text{Cu}_2\text{ZnSn}_{0.4}\text{Ge}_{0.6}\text{S}_4$  at 11.75 T.

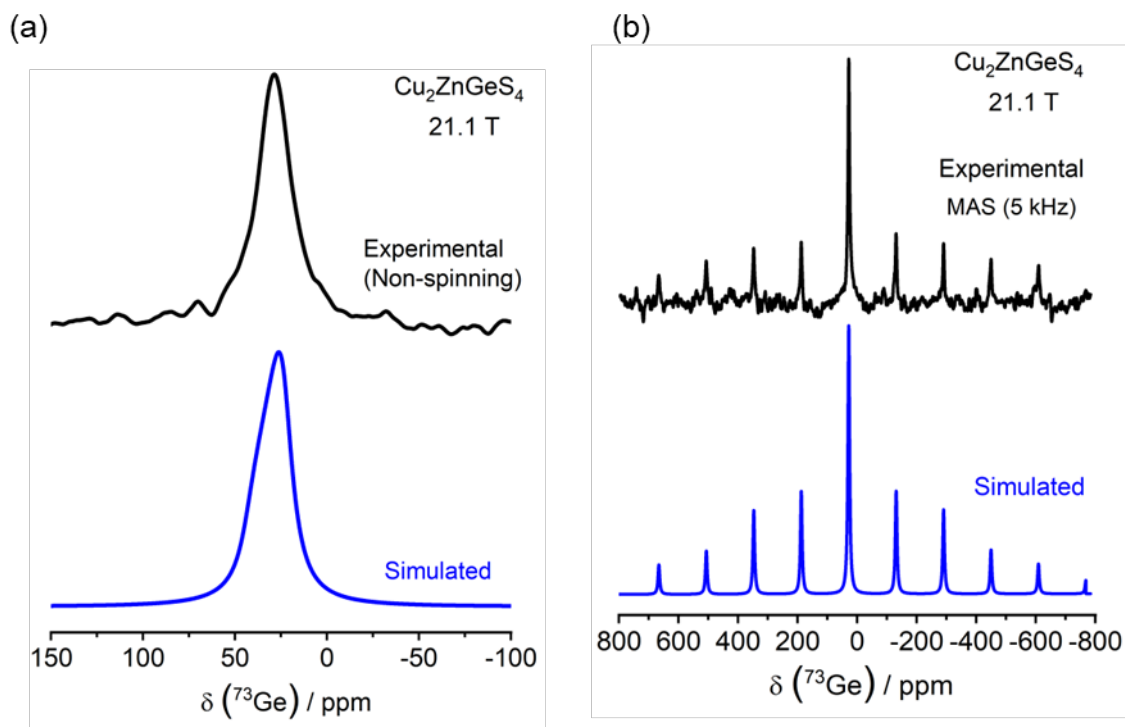

**Figure S6.** Experimental (black) and simulated (blue) (a) non-spinning and (b)  $^{73}\text{Ge}$  MAS ( $\omega_r/2\pi = 5$  kHz) NMR spectra for  $\text{Cu}_2\text{ZnGeS}_4$  ( $\delta_{\text{iso}} = 28.5$  ppm,  $C_Q = 0.3$  MHz,  $\eta = 0$ ) at 21.1 T.

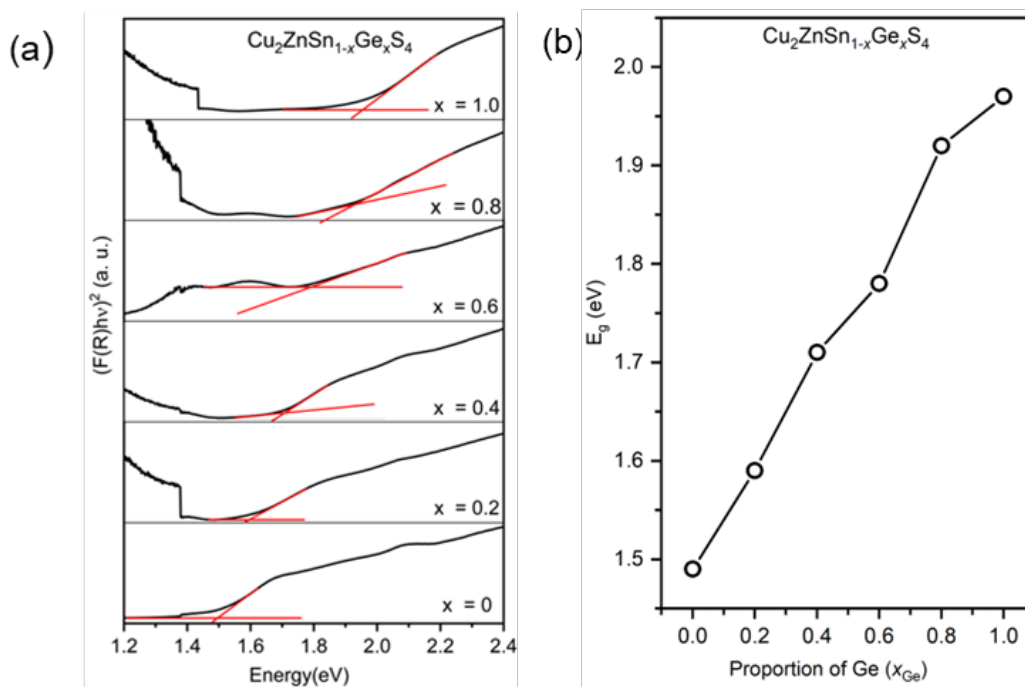

**Figure S7.** (a) Fittings of Tauc plots to extract optical band gaps. (b) Band gaps in  $\text{Cu}_2\text{ZnSn}_{1-x}\text{Ge}_x\text{S}_4$ .

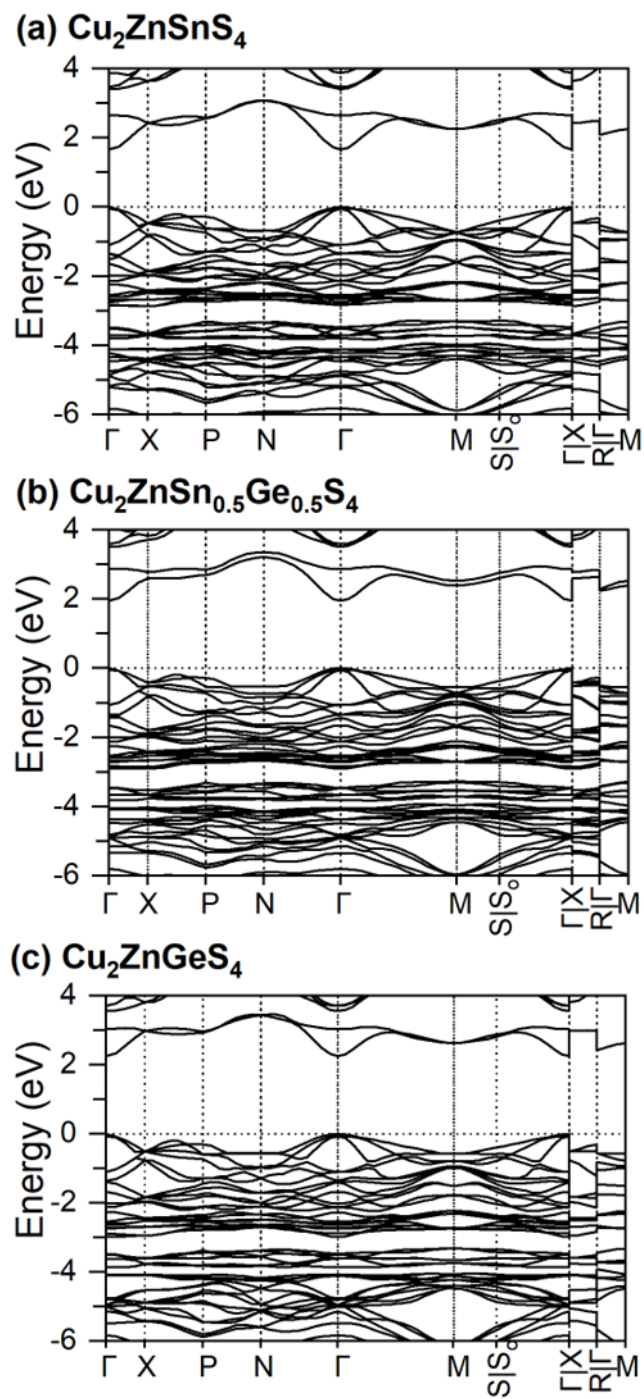

**Figure S8.** HSE06 band structure for (a) Cu<sub>2</sub>ZnSnS<sub>4</sub>, (b) Cu<sub>2</sub>ZnSnGeS<sub>4</sub>, and (c) Cu<sub>2</sub>ZnGeS<sub>4</sub>.

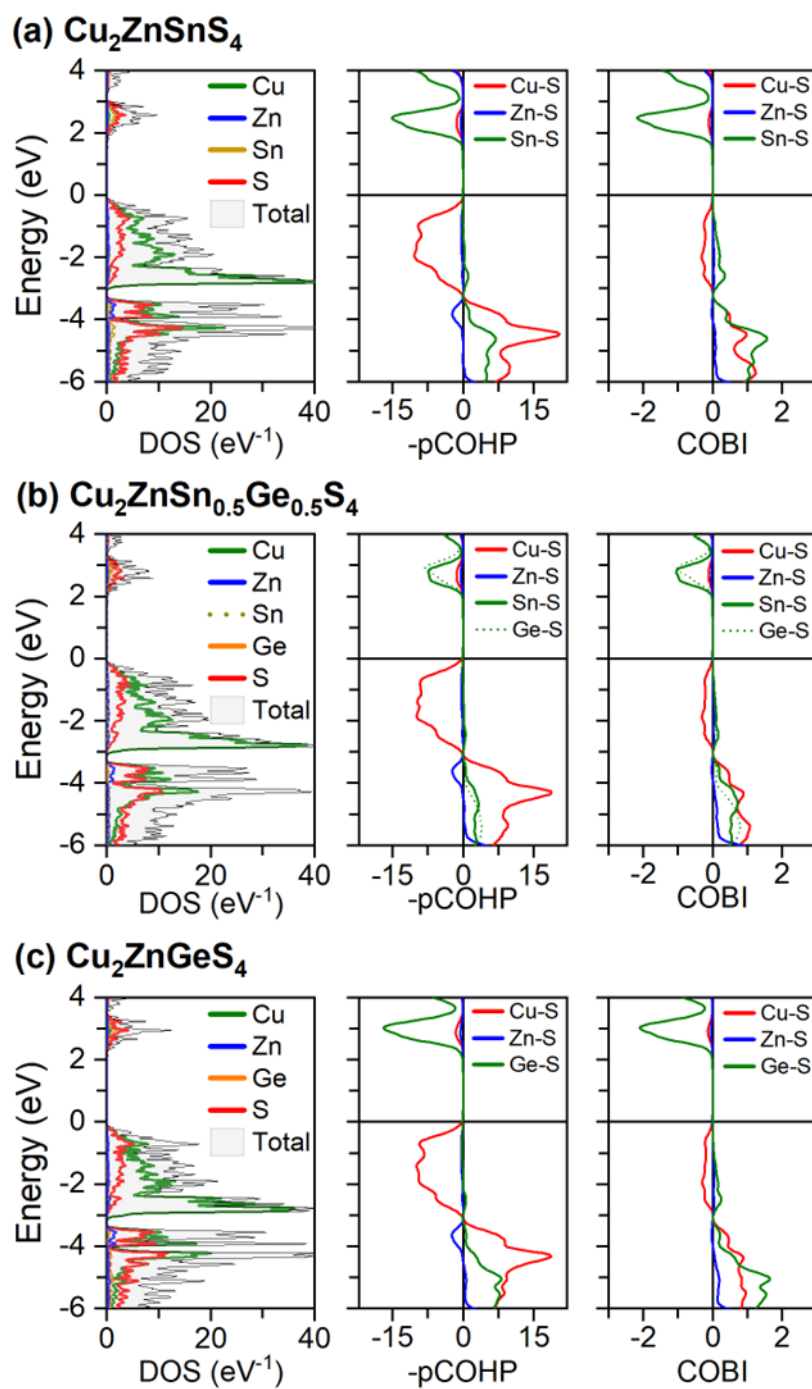

**Figure S9.** Density of states, crystal orbital Hamiltonian populations, and crystal orbital bond indices for (a)  $\text{Cu}_2\text{ZnSnS}_4$ , (b)  $\text{Cu}_2\text{ZnSnGeS}_4$ , and (c)  $\text{Cu}_2\text{ZnGeS}_4$ .
